# Supplementary material
Source: Elsevier journal article supplement (https://www.sciencedirect.com/science/article/pii/S0211563819300483)
Supplement: mmc1 [file S0211563819300483:mmc1.docx]

Apéndice A. Resultados de la Escala PEDro de los estudios incluidos.

| **CLASIFICACIÓN METODOLÍGICA DE CALIDAD SEGÚN LA ESCALA PEDro** | **1** | **2** | **3** | **4** | **5** | **6** | **7** | **8** | **9** | **10** | **11** | **TOTAL** |
| --- | --- | --- | --- | --- | --- | --- | --- | --- | --- | --- | --- | --- |
| Osborne et al 201622 | 0 | 1 | 0 | 0 | 0 | 0 | 0 | 1 | 1 | 1 | 1 | 5 |
| Sacomori et al 201523 | 1 | 1 | 0 | 1 | 0 | 0 | 0 | 0 | 1 | 1 | 1 | 5 |
| Borello et al 200824 | 1 | 1 | 0 | 1 | 0 | 0 | 0 | 0 | 1 | 1 | 1 | 5 |
| Porta Roda et al 201625 | 1 | 1 | 0 | 1 | 0 | 0 | 0 | 1 | 1 | 1 | 1 | 5 |
| Borello et al 201326 | 1 | 1 | 0 | 1 | 0 | 0 | 1 | 1 | 1 | 1 | 1 | 7 |
| Fitz et al 201727 | 1 | 1 | 1 | 1 | 0 | 0 | 1 | 1 | 1 | 1 | 1 | 8 |
| Schmidt et al 200928 | 1 | 1 | 0 | 1 | 0 | 1 | 1 | 1 | 1 | 1 | 1 | 8 |

APÉNDICE B. RESULTADOS. “Adherencia al ejercicio muscular del suelo pélvico en las mujeres con incontinencia urinaria”

| **ESTUDIO autor/año** | **N mujeres /Metodología/Tipo IU** | **Intervención** | **Efecto corto plazo** | **Periodo de seguimiento** | **Intervención para seguimiento** | **Medidas de resultado tras seguimiento** | **Pérdida de seguimiento/ adherencia seguimiento** | **Efecto en el largo plazo** |
| --- | --- | --- | --- | --- | --- | --- | --- | --- |
| **Borello-France et al. 200824** | 36/ECA/ IUE diario vesical, historia clínica y examen físico, ( prueba urodinámica, prueba de almohadilla, prueba de fuerza de MSP puntaje Brink, y QOL IIQ) | Programa EMSP supervisado 9-12 semanas. Todos los participantes. | Media pérdidas de orina por semana 1,2 2,1 versus 1,4 3,1; Pérdida de orina media 0,2 0,5 frente a 0,2 0,8 g. Media IIQ puntaje 17 20 versus 22 30. Media puntaje Brink 11 1 versus 11 1Prevalencia de IUE 60,07% versus 42,8%). | 6 meses | EMSP n 28. Alta frecuencia ( 4 veces en semana) n 15/Baja frecuencia (1 vez en semana) n 13 | Diario vesical , IIQ y (n28/28)*, resultados de fuerza PFM (24/28),prueba de almohadilla, urodinamia (n 23/28) *n= mujeres que completaron los test del total | n 8/ Diarios EMSP n 28 Alta frecuencia n =8 Baja frecuencia (1 vez en semana) n=7 | Sin diferencias significativas entre grupos de intervención en seguimiento en cumplimiento. Disminución no estadísticamente significativa en QOL. IUE 35% (no estadísticamente significativo) Resto medidas se mantienen. |
| **Schmidt et al. 200928** | n 32/ECA Historia clínica examen físico, Análisis de orina, cultivo de orina y análisis urodinámico. IU de esfuerzo (IUE) o IU mixta (MUI) | 12 semanas. Programa de ejercicio común. Evaluación inicial: Educación en 1ª consulta. DV 3 días KHQ Revisiones cada 15 días: cumplimiento y Perineometría. Portátil software: EMSP( n = 11) EMSP-biofeedback (n = 10) EMSP-estimulación eléctrica (n = 11). | Calidad de vida mejora (Pb0.02) DV menos episodios de pérdidas de orina (Pb0.05).Parámetros urodinámicos y perineométricos, aumento de fuerza (Pb0.05) Rendimiento mejor grupo biofeedback (P = 0.025). | 3 meses Cumplimiento similar 3 grupos (p = 0,201). | Programa de ejercicios sin equipo | Perineometría KHQ DV | No/No recoge datos de adherencia en fase domiciliaria. | La mayoría de los pacientes mantienen resultados alcanzados. 6 los pacientes con buena respuesta inicial se quejaron de IU; sin embargo, no continuaron los ejercicios. |
| **Borello-France et al. 201326** | N= 296 Análisis secundario planificado de datos de ECA de múltiples sitios/ (IUE/IUM) predominante de estrés. (Diario miccional, examen clínico). | Intervención conductual (incluye EMSP) sola (n = 146) o con pesarios (n = 150) Ambos grupos: 4 visitas clínicas a intervalos de 2 a 3 semanas (periodo máx. de10 semanas). Palpación vaginal (Escala Brink) Diario miccional. | A los 3 y 6 m adherencia del 95% y 88%. Buena disposición hacia el ejercicio se mantiene entre grupos. Barreras a adherencia: falta de tiempo, falta de recuerdo, falta de seguridad en efectividad. Mejora subjetiva | 12 meses Pérdidas a los 3 meses postintervención. G Intervención conductual: n= 29 Grupo pesario + intervención n =36 | Las mujeres no recibieron ninguna instrucción adicional después de la visita de 3 meses posterior a la aleatorización. Revisión de cuestionarios de adherencia a 6 y 12 meses posteriores a la aleatorización Las barreras a la adherencia se miden solo en la fase de intervención. | Datos de cuestionarios de pacientes para adherencia. Mejoría subjetiva: sin diferencia entre grupos. | Pérdidas a los 12 meses. G Intervención conductual: n= 3(total desde inicio n=32) Grupo pesario + intervención =0 (total desde inicio n=36) Adherencia 80% para continuar tratamiento. Pero de ellas el 61% lo realiza al menos 3 veces en semana. | La barrera "tener problemas para recordar hacer ejercicios" se relacionó de manera significativa con la adherencia al ejercicio a los 12 meses (P <0.001). Las tasas de ejercicio a largo plazo no difirieron entre grupos. |
| **Sacomori et al. 201523** | N 86/ ECA GC=43 GE=43. IUE IUU IUM basados en historia clínica, examen físico y cuestionario ICIQ-SF | Todos los participantes se sometieron a 3 visitas clínicas de fisioterapia individual en día 0, 15 y 30. GC EMSP. GE recibió además intervenciones para mejorar la autoeficacia: | Alta puntuación en cuestionario de adherencia sin diferencia entre grupos. Media de 71% de nota en cuestionario que se valora de 2 a 21 (media 15 puntos). Mejoría en ICIQ-SF en GE el día 30 | 2 meses  7 mujeres se retiraron de cada grupo antes de la evaluación del día 30. | Ejercicio domiciliario | Adherencia: cuestionario validado y diario. Autoeficacia (día 90) Escala auto referida. Incontinencia urinaria y función muscular del suelo pélvico, exploración física. (Oxford). ICIQ-SF 90 días | Entre los días 30 y 90 no hubo pérdidas | Adherencia: 56% del grupo experimental y el 44% del grupo de control realizaban los ejercicios todos los días. |
| **ESTUDIO autor/año** | **N mujeres /Metodología/Tipo IU** | **Intervención** | **Efecto corto plazo** | **Periodo de seguimiento** | **Intervención para seguimiento** | **Medidas de resultado tras seguimiento** | **Pérdida de seguimiento/ adherencia seguimiento** | **Efecto en el largo plazo** |
| **Porta Roda et al. 201625** | N 65/Análisis secundario de un ensayo aleatorizado (IU) (ICIQ-SF) No especifica subclasificación | GE= 35 EMSP y esferas vaginales. GC= 30 EMSP. GC Y GE: 15 min dos veces/día al menos 5 días/semana durante 6 meses. Visita a Fisioterapeuta día 0 y 7. Folleto de instrucciones para casa .Entre ambos se subclasifican en Adherentes y NO Adherentes. Adherencia día 7 MGQGC= 60% (n = 18) GE=65,7% (n = 23) | No diferencias significativas entre grupos en Adherencia. Día 30 GC50%- GE48,6% Día 90 GC50%-GE57;1% | 6 meses | Controles por fisioterapeuta. Evaluación clínica | Adherencia: cuestionario Morisky-Green (MGQ)/ICIQ-SF/prueba de almohadilla de 1 h/The Kings Health Questionnaire (KHQ)/ Escala de Likert | No pérdidas. No diferencias significativas en la adherencia al tratamiento entre los grupos pero sí una disminución en ambos grupos. GC 33.3% (n = 10) GE 42.9% (n = 15) | Las puntuaciones de ICIQ-SF al final del seguimiento entre mujeres adherentes y no adherentes fueron similares y no mostraron diferencias significativas (p = 0,143) independientemente de la asignación inicial. No indica los datos originales de cambio en la puntuación del cuestionario ICIQ-SF: no diferencias entre grupos. No indica datos estadísticos. |
| **Osborne et al. 2016 22** | N 31/ECA/Pacientes conniveles moderados de depresión y ansiedad. IU ( IUE, IUU,IUM)*Historia clínica y examen físico | GC: EMSP (n = 15) GE: Apoyo motivacional (MI)( 3 sesiones grupales) y EMSP (n = 16) Diario. EMSP: 6 sesiones grupales y visitas individuales entre sesiones entre las 2ª y 3ª grupal y tras la 6ª grupal. Ejercicio domiciliario 2/ día entre sesiones grupales. | No se recoge. Se estima una media de asistencia a final de intervención | 6 meses | Sesiones grupales y visitas individuales | Asistencia del paciente a la sesiones grupales Diarios en casa (GE) | No hay pérdidas. La media del número de clases atendidas por el GE EMSP + MI fue 4.75 (+ 1.39), en comparación con 3.33 (+ 1.63) para el grupo de solo EMSP diferencia estadísticamente significativa | 50% más de cumplimiento en GE |
| **Fitz et al. 2016 27** | N 72/ECA/IUE examen clínico y test de compresa (o IUM con predominancia IUE en valoración por informe de los pacientes). Evaluación al inicio/ tras 3 meses de tratamiento supervisado. | Comparación entre G BF n=35 (BF ambulatorio +EMSP domiciliario)/ GEMSP n=37 (EMSP ambulatorio +EMSP domiciliario). Sesiones ambulatorias: 24 de 40 min. EMSP domiciliario personalizado PERFECT. Diario de ejercicio evaluado a los 3 meses | Pérdida G BF n=5 G EMSP n=7 Frecuencia similar de ejercicios mensuales en casa GBF (67.9 de 82[[1]](#footnote-1)) y GPFMT (68.2 de 82). Igual satisfacción, pero una curación objetiva superior de la IUE para el grupo BF. (Probabilidad de curación tres veces mayor en GBF) Adherencia: GBF=85.7% GEMSP=81.1% | 9 meses | G BF y GE MSPM. Sólo EMSP domiciliario. Contacto telefónico para evaluación final | Adherencia hogar. (Diarios). Frecuencia. Asistencia ambulatoria (notas Fisio) Síntomas urinarios (Diario miccional), función muscular (Oxford) Fuerza (Perineometría) Gravedad, curación de la IUE (test de compresa) Cura subjetiva, (informe paciente), calidad de vida. (I-QoL). | G BF n=5 G EMSP n=6 El cumplimiento de los ejercicios en casa fue similar (alrededor del 50%) y se redujo significativamente en ambos grupos en comparación con los resultados de 3 meses (alrededor del 85%): GBF=51.4% GEMSP=48.6% | Ambas terapias mejoraron de manera similar la función muscular y la calidad de vida durante el estudio (P <0.005). Mejoría en la calidad de vida igual y sostenida en el seguimiento. |

APÉNDICE B. RESULTADOS Continuación

ECA: Ensayo Clínico Aleatorizado

IUE: Incontinencia Urinaria de Esfuerzo. IUU: Incontinencia Urinaria de Urgencia. UIM: Incontinencia Urinaria Mixta. EMSP: Entrenamiento muscular de suelo pélvico. QOL: Calidad de vida. DV: Diario vesical. PERFECT: escala de evaluación de la musculatura del suelo pélvico (Laycock 2002).

GE: Grupo Experimental. GC: Grupo Control. BF: Biofeedback. MGQGC: Cuestionario Morisky-Green

APENDICE C Evaluación de Calidad según Domoulin et al. (29) [[2]](#footnote-2)

| **Estudio** | **1** | | | | **2** | | **3** | **4** | **5** | **6** | **Puntuación/10** |
| --- | --- | --- | --- | --- | --- | --- | --- | --- | --- | --- | --- |
| **Borello-France et al. 2008**24 | Sí | No | No | Sí | Sí | Sí | No | Sí | No | No | 5/10 |
| **Schmidt et al 2009**28 | Sí | Sí | Sí | No | Sí | No | No | No | No | No | 4/10 |
| **Borello et al 2013**26 | Sí | Sí | Sí | Sí | Sí | Sí | No | Sí | Sí | No | 8/10 |
| **Sacomori et al. 2015**23 | Sí | Sí | Sí | Sí | Sí | Sí | Sí | No | Sí | Sí | 9/10 |
| **Porta Roda et al 2016**25 | Sí | Sí | Sí | Sí | Sí | Sí | Sí | Sí | Sí | Sí | 10/10 |
| **Osborne et al. 201622** | Sí | Sí | Sí | No | Sí | Sí | Sí | Sí | Sí | No | 8/10 |
| **Fitz et al 2017**27 | Sí | Sí | Sí | Sí | Sí | Sí | Sí | No | No | Sí | 8/10 |

1. [↑](#footnote-ref-1)
2. Con objeto de una mejor aplicación de la evaluación, hemos subdividido los apartados 1 y 2 de la siguiente forma:

   1. Monitorización e información consistente del cumplimiento de todos los participantes del estudio independientemente de la asignación del grupo (1.1), y durante intervención clínica (1.2) inmediatamente después del tratamiento (1.3) y en el seguimiento (1.4)
   2. Descripción, en los métodos de estudio, del instrumento de medición de la adherencia (incluida la administración, las propiedades psicométricas, si están disponibles y el análisis de datos) (2.1) e informar clara y completamente los datos de adherencia en los resultados (2.2).
   3. Realización de evaluaciones psicométricas de los instrumentos de medición de la adherencia para identificar medidas robustas.
   4. Realización de un análisis primario o secundario de los determinantes de la adherencia suficientemente amplios.
   5. Estudio de los determinantes previamente identificados (mediadores) (por ejemplo, intención de adherirse, autoeficacia, etc.).
   6. Diseñar estudios robustos experimentales y de observación para probar los efectos de las estrategias de adherencia identificadas como una intervención adicional al EMSP. Nota: Se ha considerado positivo el punto 6, si los puntos 1, 2 y 3 son positivos. Por ello tres de los siete se han considerado positivos.

   [↑](#footnote-ref-2)
